# Supplementary material
Source: PubMed Central journal article supplement (PMC3990013)

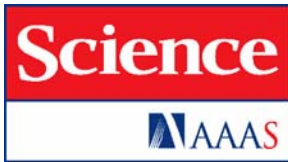

[www.sciencemag.org/cgi/content/full/328/5978/572/DC1](http://www.sciencemag.org/cgi/content/full/328/5978/572/DC1)

## Supporting Online Material for

### **Fifty Years of U.S. Embargo: Cuba's Health Outcomes and Lessons**

Paul K. Drain\* and Michele Barry

\*Author for correspondence. E-mail: [pkdrain@stanford.edu](mailto:pkdrain@stanford.edu)

Published 30 April 2010, *Science* **328**, 572 (2010)

DOI: 10.1126/science.1189680

#### **This PDF file includes**

Fig. S1

**Figure S1. Gross domestic product (GDP) per capita since 1970.**

Data from United Nations Statistics Division, National Accounts Estimates of Main Aggregates.

(United Nations, Geneva, 2009); available at <http://data.un.org>.

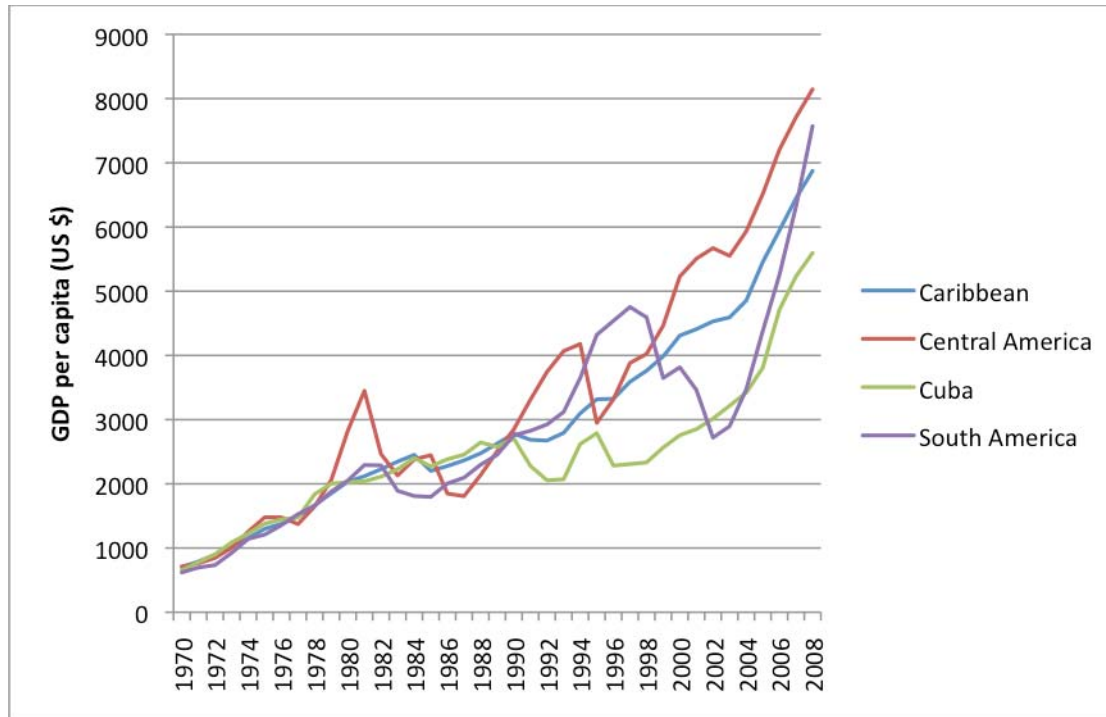

Supplement: NIHMS571355-supplement-Supplementary_Figure_S1.pdf [file NIHMS571355-supplement-Supplementary_Figure_S1.pdf]
